# Supplementary material for: Mn3O4/graphene nanocomposites: outstanding performances as highly efficient photocatalysts and microwave absorbers
Source: Royal Society of Chemistry journal article supplement (doi:10.1039/c6ra24815b), 2017-01-01

## Mn<sub>3</sub>O<sub>4</sub>/Graphene Nanocomposites: Outstanding Performances as High Efficient Photocatalysts and Microwave Absorbers

Ahmed A. Amer<sup>a</sup>, S. M. Reda<sup>a</sup>, M. A. Mousa<sup>a</sup>, Mohamed Mokhtar Mohamed<sup>a\*</sup>  
<sup>a</sup>Benha University, Faculty of Science, Chemistry Department, Benha, Egypt

**Figure S1:** Adsorption-desorption isotherms of RGO, G3M1 and G1M1 samples together with their corresponding pore size distributions.

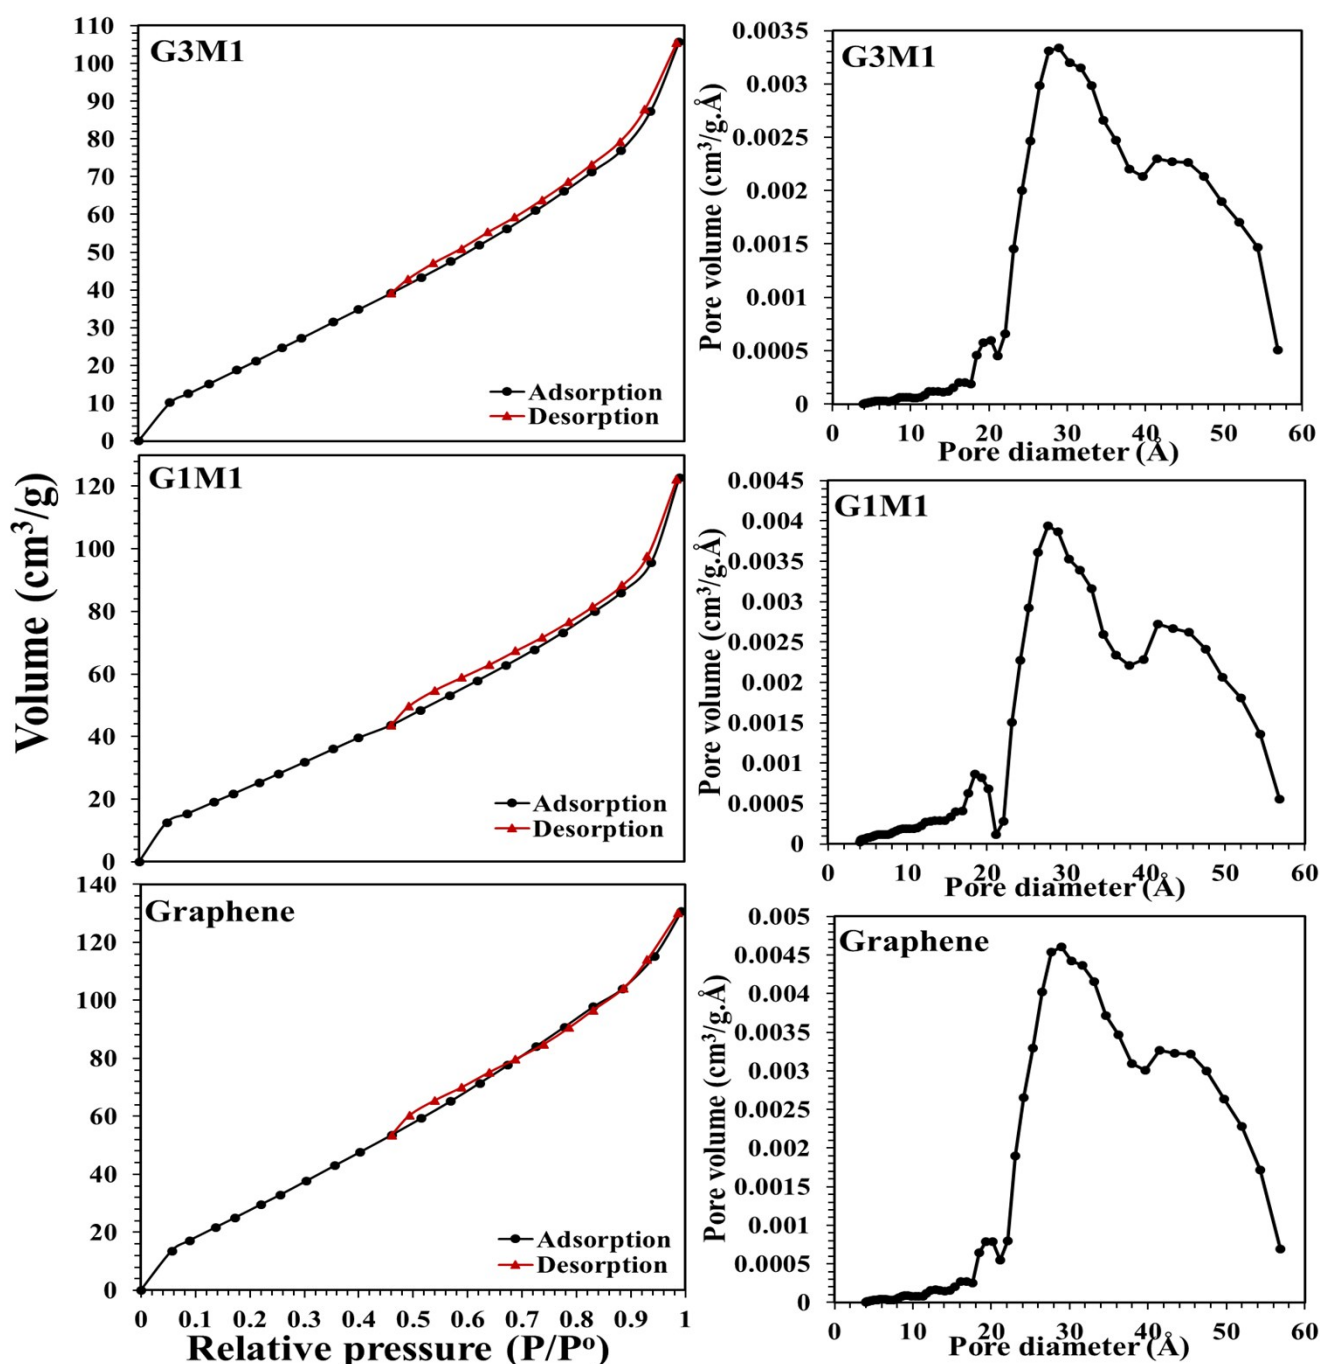

**Figure S2:** UV-vis spectra of MB while degradation using G3M1 under visible illumination and the inset is the TOC% of the same composite.

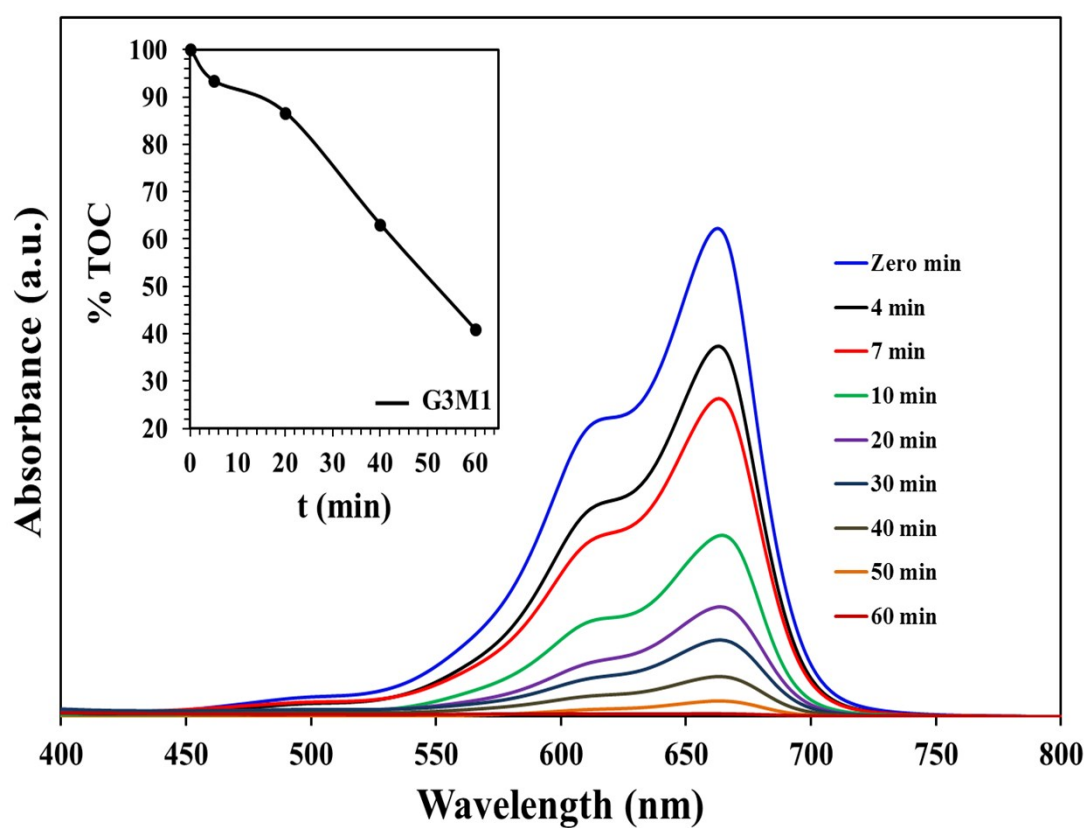

Supplement: c6ra24815b1.pdf [file c6ra24815b1.pdf]
